# Supplementary material for: Will the white blood cells tell? A potential novel tool to assess broiler chicken welfare
Source: PubMed Central journal article supplement (PMC11250086; doi:10.3389/fvets.2024.1384802), 2024-07-02
Supplement: Data_Sheet_1.pdf [file Data_Sheet_1.pdf]

## *Supplementary Material*

# Will the White Blood Cells Tell? A Potential Novel Tool to Assess Broiler Chicken Welfare

Laura Raquel Rios Ribeiro<sup>1\*</sup>, Elaine Cristina de Oliveira Sans<sup>2</sup>; Ricardo Martins Santos<sup>3</sup>; César Augusto Taconeli<sup>4</sup>; Roberta de Farias<sup>1</sup>; Carla Forte Maiolino Molento<sup>1</sup>

\* **Correspondence:** Corresponding Author: laura.ribeiro@ufpr.br

1 **Supplementary Data**

2 **Supplementary Figures and Tables**

2.1 **Supplementary Figures**

Supplementary Figure 1S to 3S.

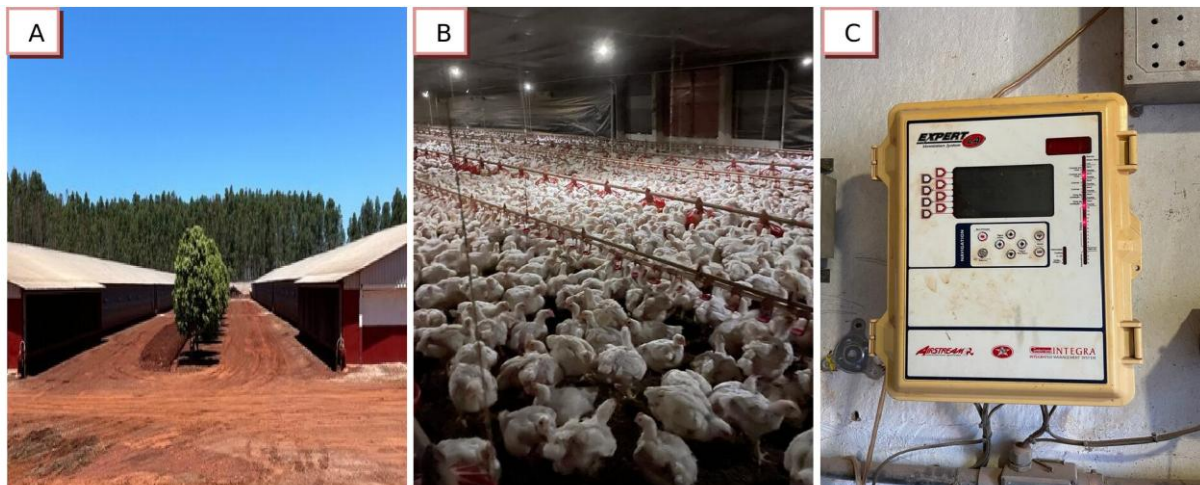

Figure 1S External (A), internal (B) and controller (C) views of poultry farm houses in the Southwest of the State of Mato Grosso do Sul, Brazil.

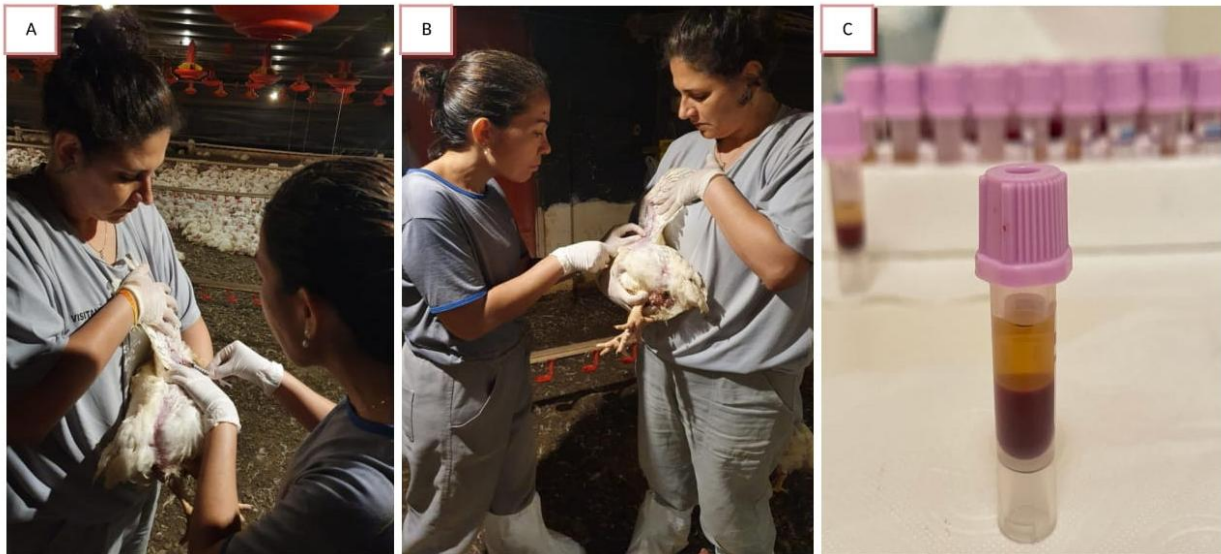

Figure 2S Blood was collected from the wing vein (A-B) in 80 birds from four poultry houses assessed in the Southeast of Mato Grosso do Sul, Brazil, in November, 2023, and stored in EDTA tubes (C).

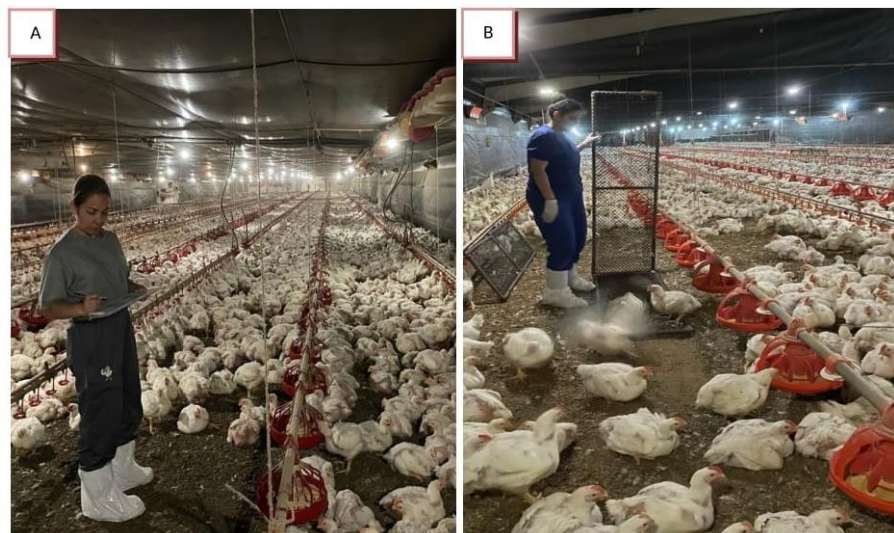

Figure 3S Internal view (A) of poultry house and close-up of groups of birds (B) during Qualitative Behavior Assessment as per the Welfare Quality® Protocol, Southeast of Mato Grosso do Sul, Brazil.

## 2.2 Supplementary Tables 1S to 5S

Table 1S. Description of the measures<sup>1</sup> of the Welfare Quality assessment protocol for poultry applied in broiler chickens (*N=350 birds assessment per house; total N=1400*) located in the State of Mato Grosso do Sul, Brazil.

| Animal welfare measure          | Description of the assessment                                                                                                                                              | Sample, birds/house |
|---------------------------------|----------------------------------------------------------------------------------------------------------------------------------------------------------------------------|---------------------|
| Breast and abdominal dermatitis | The birds were caught for the examination of breast dermatitis lesion and comparing with a 3 points, where scale zero (absence of lesion) and scale three (severe lesion). | 100                 |

|                                   |                                                                                                                                                                                                             |     |
|-----------------------------------|-------------------------------------------------------------------------------------------------------------------------------------------------------------------------------------------------------------|-----|
| Plumage cleanliness               | The birds were caught for the examination of plumage cleanliness and comparing with a 3 points, where scale zero (plumage clean ) and scale three (plumage very dirty).                                     |     |
| Pododermatitis                    | The birds were caught for the examination of pododermatitis lesion and comparing with a 5 points, where scale zero (absence of lesion) and scale four (severe lesion).                                      |     |
| Hock burn                         | The birds were caught for the examination of hock burn lesion and comparing with a 5 points, where scale zero (absence of lesion) and four (severe lesion).                                                 |     |
| Lameness                          | The birds were individually stimulated to walk and a visual inspection of walking ability of the birds was realize and comparing with a 5 points, where scale zero (normal gait) and five (unable to walk). | 150 |
| Number of drinkers                | The type and number of drinkers and number of housed birds were registered.                                                                                                                                 | -   |
| Density                           | Barn dimensions (m <sup>2</sup> ), broiler number and average body weight (kg) were registered at each visit to calculate bird density.                                                                     | -   |
| Mortality                         | Number of birds found dead in the barn, according to barn control spreadsheet.                                                                                                                              | -   |
| Qualitative behavioral assessment | The birds were observed for ten minutes. The group was scored between zero (absence) and 125 (maximum expression) for each positive and negative emotional state.                                           | 100 |

<sup>1</sup> Measures were adapted; for full and original descriptions see Welfare Quality® Assessment Protocol for Poultry (WELFARE QUALITY®, 2009).

Table 2S. Temperature, air velocity, light intensity, relative humidity and ammonia (NH<sub>3</sub>) assessed poultry houses, Southwest of Mato Grosso do Sul, Brazil.

| Variable                      | PH 1<br>Itaporã | PH 2<br>Dourados | PH 3<br>Glória de Dourados | PH 4<br>Laguna Caarapã |
|-------------------------------|-----------------|------------------|----------------------------|------------------------|
| Outdoor Temperature (°C)      | 32.00           | 30.20            | 29.50                      | 25.40                  |
| Indoor Temperature (°C)       | 31.10           | 28.50            | 27.00                      | 26.25                  |
| Indoor Air velocity (m/s)     | 2.20            | 3.20             | 2.50                       | 2.00                   |
| Outdoor Air velocity (m/s)    | 1.60            | 3.10             | 3.60                       | 1.50                   |
| Light intensity (lx) indoor   | 15              | 15               | 12                         | 10                     |
| Light intensity (lx) outdoor  | >20.000         | >20.000          | >20.000                    | 12810                  |
| Indoor Relative Humidity (%)  | 47.00           | 55.20            | 51.00                      | 63.50                  |
| Outdoor Relative Humidity (%) | 24.70           | 47.20            | 45.00                      | 76.00                  |
| Ammonia (ppm)                 | 7.50            | 9.00             | 8.00                       | 7.00                   |

Table 3S. Classification the scores of the health indicators assessment in poultry houses of poultry houses (PH), Southwest of Mato Grosso do Sul, Brazil.

| Health indicator                  | Classification                     | PH 1 | PH 2 | PH 3 | PH 4 |
|-----------------------------------|------------------------------------|------|------|------|------|
| Breast and abdominal Dermatitis % | C1 (0) - normal                    | 62   | 17   | 41   | 58   |
|                                   | C2 (1) - moderate abnormality      | 31   | 38   | 32   | 32   |
|                                   | C3 (2 to 3) - severe abnormality   | 7    | 45   | 27   | 10   |
| Plumage cleanliness %             | C1 (0) - normal                    | 39   | 22   | 47   | 41   |
|                                   | C2 (1) - moderate abnormality      | 53   | 45   | 43   | 41   |
|                                   | C3 (2 to 3) - severe abnormality   | 8    | 33   | 10   | 18   |
| Pododermatitis%                   | C1 (0) - normal                    | 78   | 69   | 60   | 32   |
|                                   | C2 (1) - moderate abnormality      | 14   | 22   | 15   | 12   |
|                                   | C3 (2 to 4) - severe abnormality   | 8    | 9    | 25   | 56   |
| Hock burn %                       | C1 (0) - normal                    | 54   | 70   | 97   | 86   |
|                                   | C2 (1) - moderate abnormality      | 42   | 23   | 3    | 13   |
|                                   | C3 (2 to 4) - severe abnormality   | 4    | 7    | 0    | 1    |
| Lameness %                        | C1 (0 to 1) - normal               | 5    | 17   | 0    | 0    |
|                                   | C2 (2 to 3) - moderate abnormality | 81   | 79   | 93   | 50   |
|                                   | C3 (4 to 5) - severe abnormality   | 13   | 3    | 7    | 50   |

Table 4S. Hematological parameters and differential cell count from 80 birds in each of the four studied houses, Southwest of Mato Grosso do Sul, Brazil.

| Variable                    | PH 1              | PH 2              | PH 3               | PH 4              | Reference Values       |
|-----------------------------|-------------------|-------------------|--------------------|-------------------|------------------------|
|                             | Itaporã           | Dourados          | Glória de Dourados | Laguna Caarapã    |                        |
| Heterophil (%)              | 35.8 <sup>a</sup> | 43.5 <sup>b</sup> | 60.3 <sup>c</sup>  | 60.9              | 15-50 <sup>1</sup>     |
| Band+Meta+Mielo (%)         | 0.3               | 0.1               | 1.1                | 1.2               |                        |
| Lymphocyte (%)              | 59.2 <sup>a</sup> | 50.6 <sup>b</sup> | 25.4 <sup>c</sup>  | 31.0 <sup>d</sup> | 29-84 <sup>1</sup>     |
| Eosinophil (%)              | 2.1               | 2.7               | 0.9                | 1.8               | 0-16 <sup>1</sup>      |
| Basophil (%)                | 0.0               | 0.0               | 0.0                | 0.0               | 0-8 <sup>1</sup>       |
| Monocyte (%)                | 2.4 <sup>a</sup>  | 3.1 <sup>a</sup>  | 12.7 <sup>b</sup>  | 5.1 <sup>c</sup>  | 0-7 <sup>1</sup>       |
| Heterophil/Lymphocyte ratio | 0.70 <sup>a</sup> | 1.03 <sup>b</sup> | 3.03 <sup>c</sup>  | 2.58 <sup>c</sup> | 0.2-0.7 <sup>2,3</sup> |

<sup>1</sup>Thrall et al. (2015)<sup>2</sup>Gross & Siegel (1993)<sup>3</sup>Carpenter & Harms (2023)

Table 5S. Description of the main points of the statistical analysis (response variables, response measure, predictor, experimental unit, statistical modal, statistical tests and model fit assessment).

| Response variable                            | Response Measure                                                                                 | Predictor      | Experimental unit | Statistical model                  | Statistical tests                             | Model fit assessment |
|----------------------------------------------|--------------------------------------------------------------------------------------------------|----------------|-------------------|------------------------------------|-----------------------------------------------|----------------------|
| Heterophils                                  | Number of heterophils in 100 blood cells                                                         | Poultry houses | Birds             | Quasi-binomial GLM                 | Wald test followed by Tukey's HSD             | Residual analysis    |
| Lymphocytes                                  | Number of lymphocytes in 100 blood cells                                                         |                |                   |                                    |                                               |                      |
| Monocytes                                    | Number of monocytes in 100 blood cells                                                           |                |                   |                                    |                                               |                      |
| HL Ratio                                     | HL Ratio value                                                                                   |                |                   |                                    |                                               |                      |
| Breast and abdominal dermatitis <sup>1</sup> | Visual inspection, comparing with a 4 points scale (percentage of birds scoring 0 to 3)          | Poultry houses | Birds             | Proportional odds regression model | Likelihood ratio test followed by Tukey's HSD | Residual analysis    |
| Plumage cleanliness <sup>1</sup>             | Visual inspection, comparing with a 4 points scale (percentage of birds scoring 0 to 3)          |                |                   |                                    |                                               |                      |
| Pododermatitis <sup>1</sup>                  | Visual inspection, comparing with a 5 points scale (percentage of birds scoring 0 to 4)          |                |                   |                                    |                                               |                      |
| Hock burns <sup>1</sup>                      | Visual inspection, comparing with a 5 points scale (percentage of birds scoring 0 to 4)          |                |                   |                                    |                                               |                      |
| Lameness <sup>1</sup>                        | Visual inspection of walking ability using a 6 points scale (percentage of birds scoring 0 to 5) |                |                   |                                    |                                               |                      |
| QBA variables                                | Exploratory analysis using heatmap                                                               |                |                   |                                    |                                               |                      |

<sup>1</sup>Response variable from Welfare Quality® Assessment Protocol for Poultry
